# Supplementary material for: Uric Acid and Neurocognitive Function in Survivors of Childhood Acute Lymphoblastic Leukemia Treated with Chemotherapy Only
Source: Oxford University Press journal article supplement (doi:10.1158/1055-9965.epi-16-0118), 2016-06-26
Supplement: 10559965epi160118-sup-161739_1_supp_3494762_777g59.docx [file 10559965epi160118-sup-161739_1_supp_3494762_777g59.docx]

Supplementary Table S1: Treatment Protocols for Acute Lymphoblastic Leukemia in Adult Survivors (N=226)

| **Protocol** | **n (%)** |
| --- | --- |
| ALLR15/ALLR16^ | 4 (1.7) |
| Total therapy X* | 7 (3.1) |
| Total therapy XI* | 32 (14.2) |
| Total therapy XII* | 39 (17.2) |
| Total therapy XIII* | 111 (49.1) |
| Total therapy XIV* | 8 (3.5) |
| Total therapy XV* | 9 (4.0) |
| Others | 4 (1.7) |
| Non-protocol | 12(5.3) |

^ ALLR15/ALLR16 consists of etoposide administered orally as a single agent, followed by dexamethasone, vincristine, and l-asparaginase.[29]

* The Total Therapy protocols consists of intensive systemic and intrathecal therapy but does not include cranial irradiation, irrespective of a patient's risk features. The intensity of post-remission consolidation, continuation and reinduction therapy is based on the level of minimal residual disease at the end of induction. The drugs used are prednisone, vincristine, daunorubicin, PEG-L-asparaginase, Erwinia L-asparaginase, doxorubicin, cyclophosphamide, cytarabine, thioguanine, clofarabine, methotrexate, mercaptopurine, dexamethasone, etoposide and dasatinib. [1,2,30,31]
